# Supplementary material for: Carbon aerogel capsulated cobalt oxides with nanomicro-hierarchical architectures as anodes for lithium-ion batteries
Source: Royal Society of Chemistry journal article supplement (doi:10.1039/d3nj05671f), 2024-01-01
Supplement: d3nj05671f1.pdf [file d3nj05671f1.pdf]

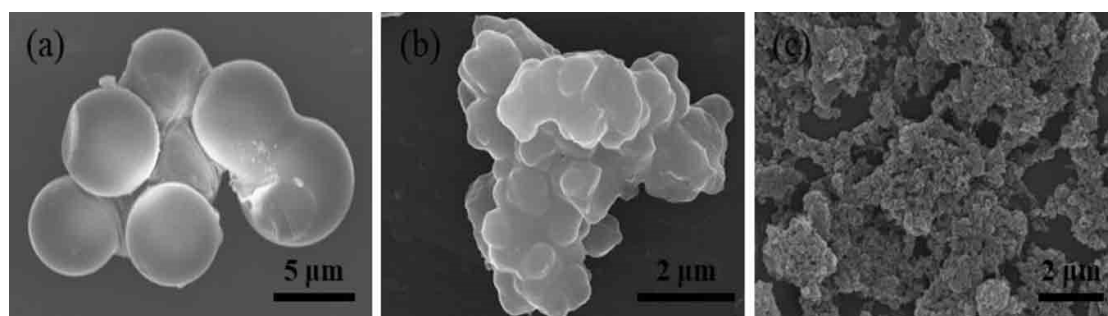

Fig. S1 SEM of NCA-1(a), NCA-2(b), NCA-3(c)

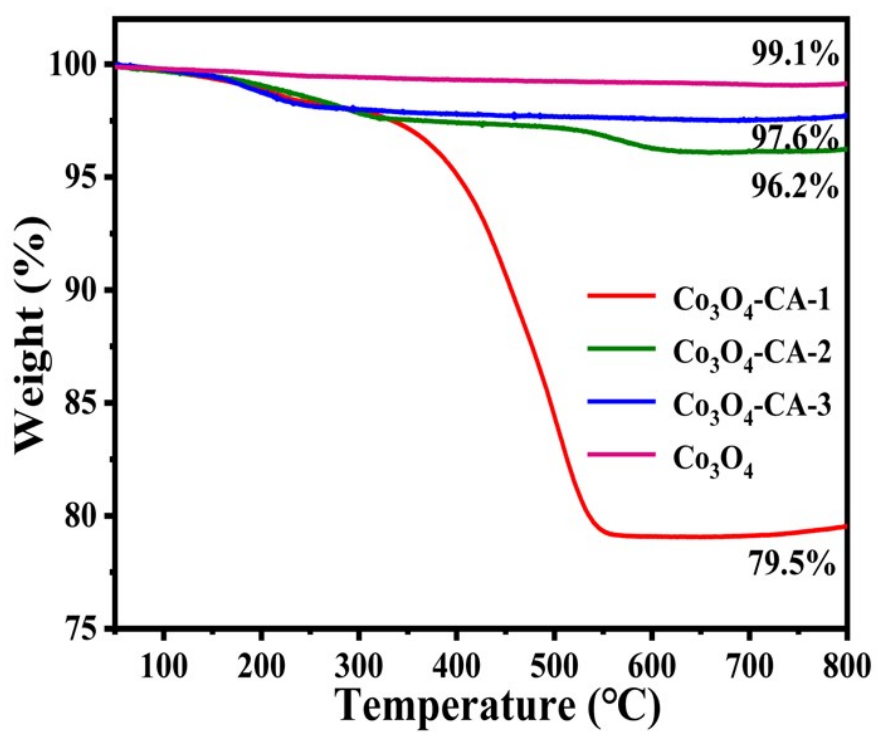

Fig. S2 TG analysis of Co<sub>3</sub>O<sub>4</sub>@NCA-1, Co<sub>3</sub>O<sub>4</sub>@NCA-2, Co<sub>3</sub>O<sub>4</sub>@NCA-3 and Co<sub>3</sub>O<sub>4</sub> materials.

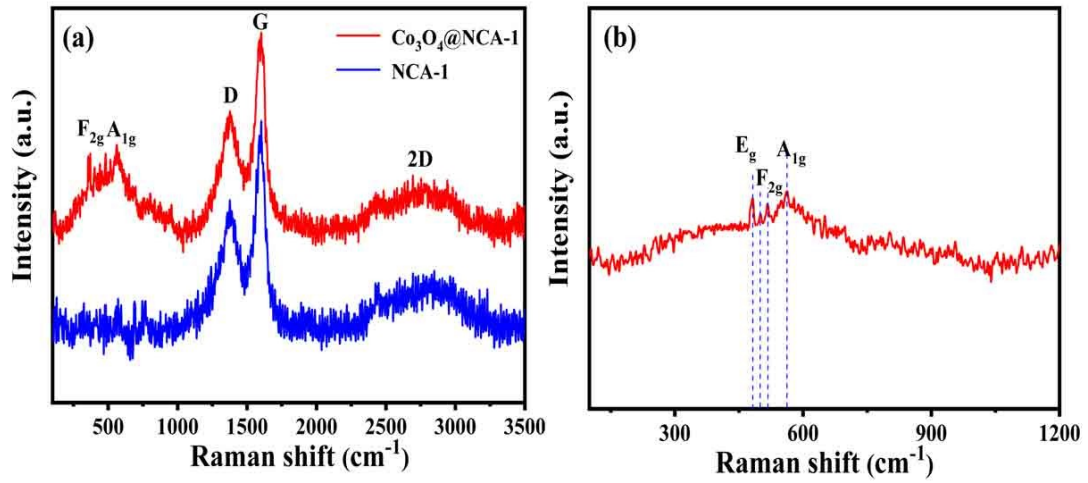

Fig. S3 Raman of NCA-1 and Co<sub>3</sub>O<sub>4</sub>@NCA-1(a) and partial enlarged detail of Co<sub>3</sub>O<sub>4</sub>@NCA-1 (b).

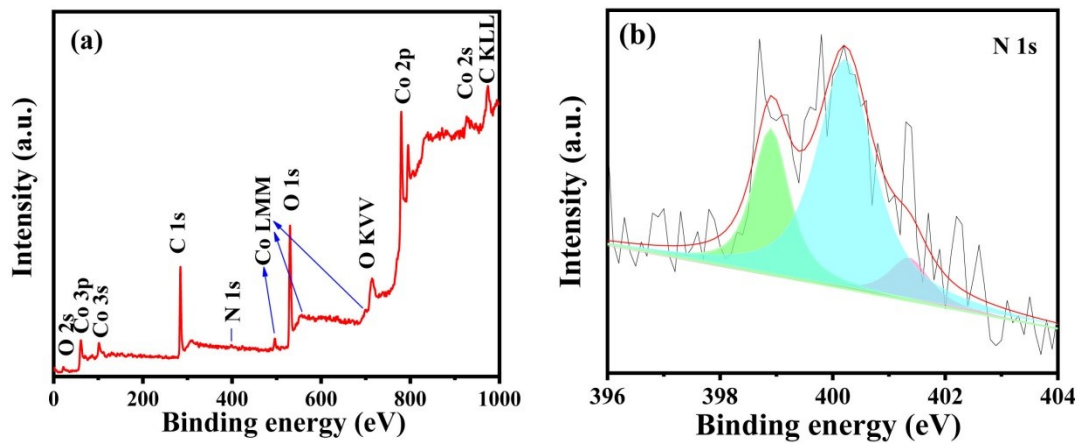

Fig. S4 XPS full spectra of  $\text{Co}_3\text{O}_4@\text{NCA-1}$  (a) and N1s spectra of  $\text{Co}_3\text{O}_4$  coated with high content of NCA-1(b).

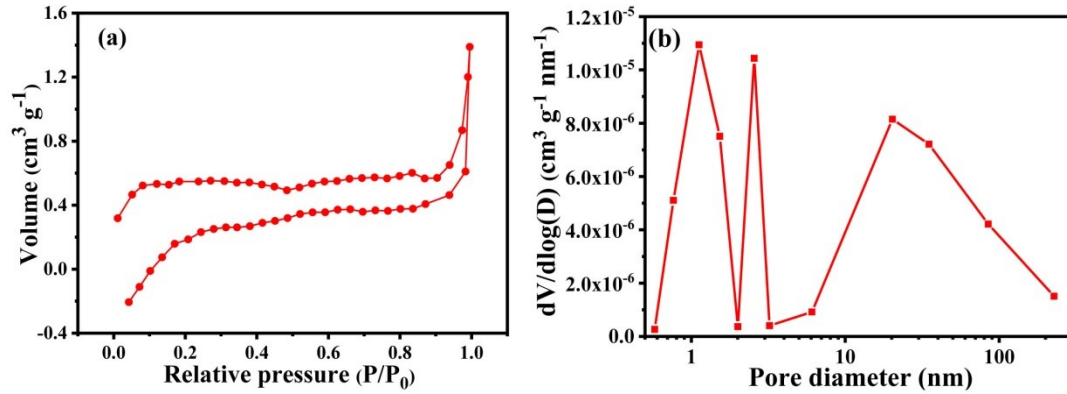

Fig. S5 Nitrogen adsorption-desorption isotherms (a) and BJH pore diameter distribution curve (b) of NCA-1.

The specific surface area of NCA-1 is 2.8 m<sup>2</sup>/g, which is lower than that of Co<sub>3</sub>O<sub>4</sub> (5.3 m<sup>2</sup> g<sup>-1</sup>) and even lower than that of Co<sub>3</sub>O<sub>4</sub>/NCA-1 (355.5 m<sup>2</sup> g<sup>-1</sup>). It exhibits a type IV isotherm shown in Fig. 2(a), similar to Co<sub>3</sub>O<sub>4</sub> and Co<sub>3</sub>O<sub>4</sub>@NCA-1. Furthermore, the pore size distribution demonstrated that not only mesopores and macropores but also micropores are present in the NCA-1 material, which would contribute to lithium storage performance.

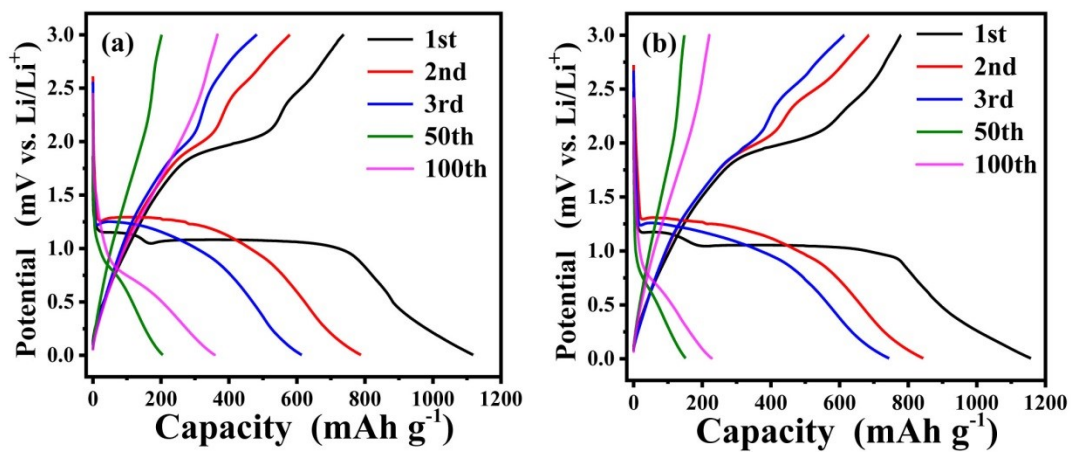

Fig. S6 The initial three, the 50th and the 100th CV curves of Co<sub>3</sub>O<sub>4</sub>@NCA-2(a) and Co<sub>3</sub>O<sub>4</sub>@NCA-3(b).

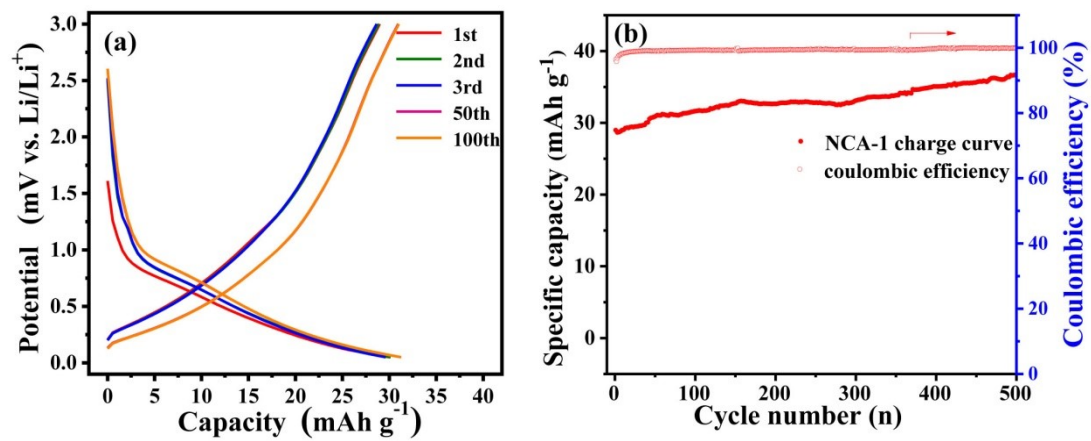

Fig. S 7 The charge/discharge curves (a) and cycling performance (b) of NCA-1 at a current density of 0.1A g<sup>-1</sup>.

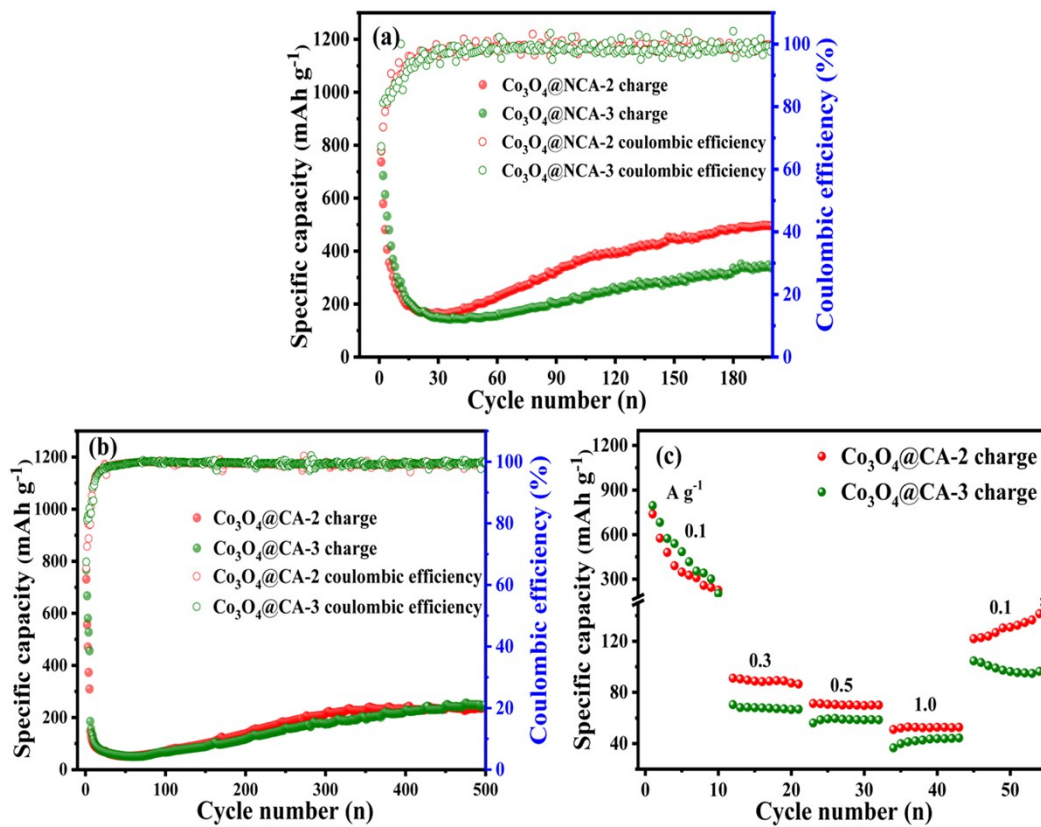

Fig. S8 Cycling performance and the corresponding coulombic efficiency of  $\text{Co}_3\text{O}_4$ @NCA-2 and  $\text{Co}_3\text{O}_4$ @NCA-3 at 0.1 A g<sup>-1</sup> (a) and 0.5 A g<sup>-1</sup> (b), rate performance of  $\text{Co}_3\text{O}_4$ @NCA-2 and  $\text{Co}_3\text{O}_4$ @NCA-3(c).



Tab. S1 Comparison of the electrochemical performances of various cobalt-based/carbon nanocomposites as anode materials for LIBs

| Active material                                     | Current density mA g <sup>-1</sup> | Capacity mAh g <sup>-1</sup><br>(Nth) | Reference |
|-----------------------------------------------------|------------------------------------|---------------------------------------|-----------|
| Co <sub>3</sub> O <sub>4</sub> @NCA-1               | 100                                | 608(200)                              | This work |
|                                                     | 100                                | 659.9(100)                            |           |
|                                                     | 500                                | 291.7(500)                            |           |
| NiO-Co <sub>3</sub> O <sub>4</sub>                  | 70                                 | 673 (100)                             | [44]      |
| Co <sub>3</sub> O <sub>4</sub>                      | 89                                 | 423(30)                               | [45]      |
|                                                     | 89                                 | 321(60)                               |           |
| Co <sub>3</sub> O <sub>4</sub> @TiO <sub>2</sub> @C | 200                                | 380.3(100)                            | [46]      |
| Co <sub>3</sub> O <sub>4</sub>                      | 90                                 | 166(100)                              | [47]      |
| Co <sub>3</sub> O <sub>4</sub> /TiO <sub>2</sub>    | 100                                | 660(120)                              | [48]      |
